# Supplementary material for: Multifunctionality of cerium decoration in enhancing the cycling stability and rate capability of a nickel-rich layered oxide cathode
Source: Royal Society of Chemistry journal article supplement (doi:10.1039/d1nr05912b), 2021-01-01
Supplement: d1nr05912b1.pdf [file d1nr05912b1.pdf]

## Support information

# Multifunction of cerium decoration on enhancing the cycling stability and rate capability of Nickel-rich layered oxide cathode

Shuaipeng Hao<sup>ab,1</sup>, Dianwei Zhang<sup>ab,1</sup>, Yunjiao Li<sup>ab,\*</sup>, Xiaoming Xi<sup>c</sup>, Shan Wang<sup>ab</sup>, Xiaohui Li<sup>ab</sup>,

Xingjie Shen<sup>ab</sup>, Shuaiwei Liu<sup>ab</sup>, Junchao Zheng<sup>ab</sup>.

<sup>a</sup>School of Metallurgy and Environment, Central South University, Changsha, 410083, PR China

<sup>b</sup>Engineering Research Center of the Ministry of Education for Advanced Battery Materials, Central South University, Changsha 410083, China

<sup>c</sup>Changsha Research Institute of Mining and Metallurgy, Changsha 410083, PR China.

<sup>1</sup>Shuaipeng Hao and Dianwei Zhang contributed equally to this paper.

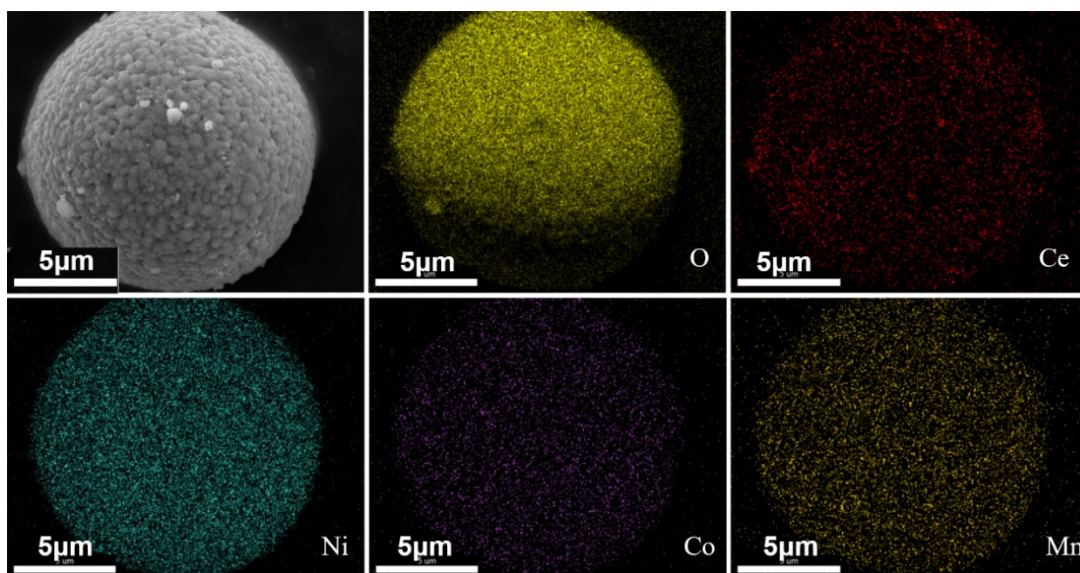

Fig. S1. The EDS elemental mapping results of Ce-NCM811.

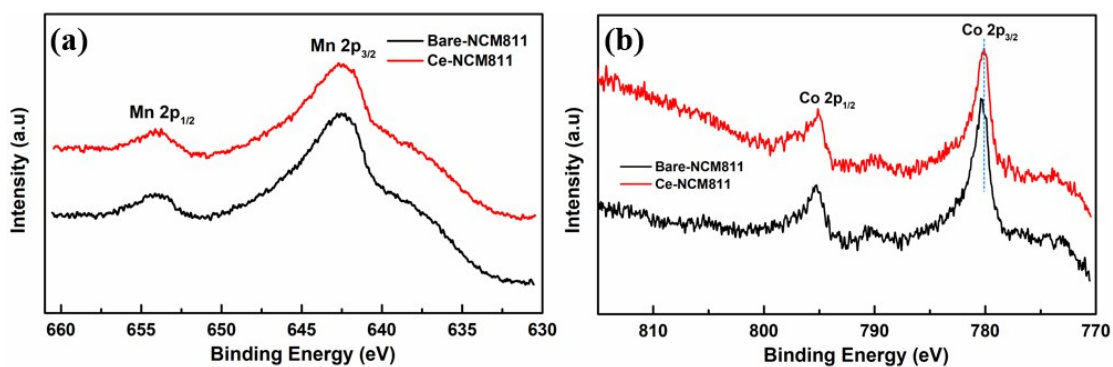

Fig. S2. XPS spectra of the Bare-NCM811 and Ce-NCM811 (a) Mn 2p; (b) Co 2p.
